# Supplementary material for: Transcriptome profiling in engrailed-2 mutant mice reveals common molecular pathways associated with autism spectrum disorders
Source: PubMed Central journal article supplement (PMC3896729; doi:10.1186/2040-2392-4-51), 2013-12-19

# En2 expression

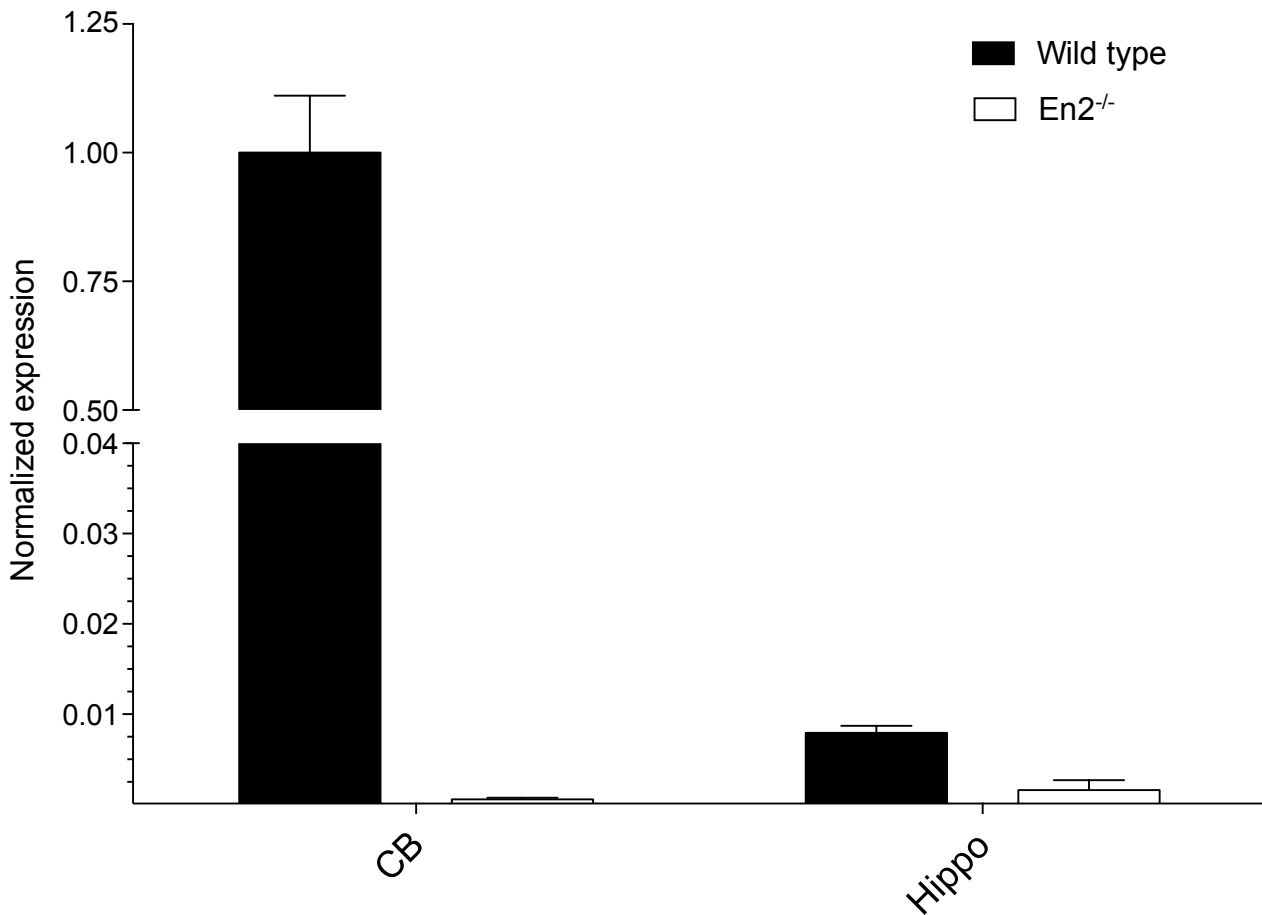

Supplement: 2040-2392-4-51-S4.pdf [file 2040-2392-4-51-S4.pdf]
