# Supplementary material for: Transcriptome profiling in engrailed-2 mutant mice reveals common molecular pathways associated with autism spectrum disorders
Source: Mol Autism. 2013 Dec 19;4:51. doi: 10.1186/2040-2392-4-51 (PMC3896729; doi:10.1186/2040-2392-4-51)
Supplement: Additional file 5 — Integrated gene-network analysis and gene ontology enrichment. Tables a-f show the ten most significant disease and functional annotations obtained with Ingenuity Pathways Analysis (IPA) for En2 -/- cerebellum (a-c) and En2 -/- hippocampus (d-f) differentially expressed genes. Functional categories and annotations are shown with their P value, the predicted activation state, the activation z-score, the associated genes and the number of enriched genes. Activation z-score >2 or < -2 indicates significantly increased or decreased annotations. Tables g-j show gene ontology analysis details for En2 -/- cerebellum (g, h) and En2 -/- hippocampus (i, j) differentially expressed genes. Gene ontology annotations are shown with gene counts and corrected P values. Significant disease and functions for up- (c, f, h) and downregulated (b, e, j) genes are shown separately. [file 2040-2392-4-51-S5.xls]

## Sheet: Sheet1
(a) Cerebellum Differentially expressed genes - IPA
Category	Diseases or Functions Annotation	p-Value	Predicted Activation State	Activation z-score	Molecules	# Molecules
Cell Death and Survival	colony survival of tumor cell lines	6.44e-05		-0.137	CA9,CCND1,CDKN1A,RB1CC1,SLPI,TERC,TP53	7
Cancer	malignant neoplasm of abdomen	9.88e-05	Decreased	-2.236	ABCB10,ACTL6B,ADRA2C,ADRB1,AFF3,ALPK2,AMD1,ANKRD26,APOC1,AQP1,ASPG,ATAD2B,ATF2,AZGP1,BMP5,BPNT1,BUB1,C14orf39,C7orf63,CA9,CACHD1,CACNA1G,CAMK2N1,CAMK4,CCDC141,CCDC88A,CCL21,CCND1,CD74,CDC20,CDC42EP1,CDH10,CDH18,CDHR1,CDK5R2,CDKN1A,CDKN1B,CEP164,CFB,CHD1,CHD3,CHRDL1,CIT,CLDN5,CLEC3B,CLSTN1,COL2A1,COL4A4,CPS1,CREB3L3,CSNK1A1,DDX3X,DFNB31,DUSP7,DUSP9,DYNLL1,EIF2AK2,EIF3J,ELAVL2,EML6,ENOX2,EPHA2,EPHA…	258
Connective Tissue Disorders	arthropathy	0.000143			ACTL6A,ADA,ADAMTS9,ADRA2C,ADRB1,AHI1,ALPK2,ATP8A1,BMP5,C2,CAMK2D,CCL21,CD74,CFB,COL2A1,COMP,CYP4F3,DYNLL1,FCGR1A,FKBP5,FUBP1,GABRA2,GLUL,GRN,HLA-B,HLA-DQA1,HLA-DRB1,HOXC4,IGFBP1,IL10RA,IL16,KHSRP,LPIN1,MINK1,MMP17,MYBPC1,MYL12A,NR4A2,OCA2,PADI2,PCM1,PDGFD,PHACTR3,PPP1R11,RBP4,RPL11,SLC1A2,SLC22A12,SLC6A2,SLC6A3,SLC7A11,SLCO2A1,STK17B,TIMP3,TLR2,TNFRSF11B,TP53,TRAF1,TRIM26,TUBA8,TYMS,USP15,VARS2,V…	65
Cellular Function and Maintenance	development of natural killer T lymphocytes	0.000204			CD1D,ELF4,IL15	3
Cell Cycle	arrest in G1 phase of prostate cancer cell lines	0.00024			CCND1,CDKN1B,KLK3,SP1,TP53	5
Connective Tissue Disorders	arthritis	0.000257			ACTL6A,ADA,ADAMTS9,ADRA2C,ADRB1,AHI1,ALPK2,ATP8A1,BMP5,C2,CAMK2D,CCL21,CD74,CFB,COL2A1,COMP,CYP4F3,DYNLL1,FCGR1A,FKBP5,FUBP1,GABRA2,GLUL,GRN,HLA-B,HLA-DQA1,HLA-DRB1,HOXC4,IGFBP1,IL10RA,IL16,KHSRP,LPIN1,MINK1,MMP17,MYL12A,NR4A2,OCA2,PADI2,PCM1,PDGFD,PHACTR3,PPP1R11,RBP4,RPL11,SLC1A2,SLC22A12,SLC6A2,SLC6A3,SLC7A11,STK17B,TIMP3,TLR2,TNFRSF11B,TP53,TRAF1,TRIM26,TUBA8,TYMS,USP15,VARS2,VSIG10,XDH	63
Cancer	adenocarcinoma	0.000444			ABCB10,ACTL6B,ACVRL1,ADAMTS10,ADAMTSL3,AFF3,AHI1,ALPK2,ANKRD26,ANXA8L2 (includes others),ANXA9,AQP1,ARID5B,ASPG,ATAD2B,ATF2,BOD1L1,BPNT1,BUB1,C14orf39,C7orf63,CA9,CACHD1,CACNA1G,CAMK2N1,CAMK4,CBLN1,CCDC141,CCDC88A,CCL21,CCNB1IP1,CCND1,CDC20,CDC42EP1,CDH10,CDH18,CDHR1,CDKN1A,CEP164,CFB,CHD1,CHD3,CHRDL1,CIT,CLDN5,CLEC3B,CLIP1,CLSTN1,COL4A4,CPB2,CPS1,CUL9,DDX23,DDX3X,DFNB31,DLK1,DUSP7,DUSP9,E2F6,EIF…	247
Cancer	carcinoma	0.000495			ABCB10,ACTL6B,ACVRL1,ADAMTS10,ADAMTS9,ADAMTSL3,ADRA2C,AFF3,AHI1,ALPK2,ANKRD26,ANXA8L2 (includes others),ANXA9,APOC1,AQP1,ARID5B,ASPG,ATAD2B,ATF2,AZGP1,BMP5,BOD1L1,BPNT1,BUB1,C14orf39,C7orf63,CA9,CACHD1,CACNA1G,CAMK2N1,CAMK4,CBLN1,CCDC141,CCDC88A,CCL21,CCNB1IP1,CCND1,CD74,CDC20,CDC42EP1,CDH10,CDH18,CDHR1,CDK5R2,CDKN1A,CDKN1B,CEP164,CFB,CHD1,CHD3,CHRDL1,CIT,CLDN5,CLEC3B,CLIP1,CLSTN1,COL2A1,COL4A4,C…	313
Cancer	solid tumor	0.000591			ABCB10,ACTL6B,ACVRL1,ADAMTS10,ADAMTS9,ADAMTSL3,ADRA2C,AFF3,AHI1,ALPK2,ANKRD26,ANXA8L2 (includes others),ANXA9,APOC1,AQP1,ARID5B,ASPG,ATAD2B,ATF2,AZGP1,BMP5,BOD1L1,BPNT1,BUB1,C14orf39,C7orf63,CA9,CACHD1,CACNA1G,CAMK2N1,CAMK4,CBLN1,CCDC141,CCDC88A,CCL21,CCNB1IP1,CCND1,CD74,CDC20,CDC42EP1,CDH10,CDH18,CDHR1,CDK5R2,CDKN1A,CDKN1B,CEP164,CFB,CHD1,CHD3,CHRDL1,CIT,CLDN5,CLEC3B,CLIP1,CLSTN1,COL2A1,COL4A4,C…	314
Cancer	epithelial neoplasia	0.000687			ABCB10,ACTL6B,ACVRL1,ADAMTS10,ADAMTS9,ADAMTSL3,ADRA2C,AFF3,AHI1,ALPK2,ANKRD26,ANXA8L2 (includes others),ANXA9,APOC1,AQP1,ARID5B,ASPG,ATAD2B,ATF2,AZGP1,BMP5,BOD1L1,BPNT1,BUB1,C14orf39,C7orf63,CA9,CACHD1,CACNA1G,CAMK2N1,CAMK4,CBLN1,CCDC141,CCDC88A,CCL21,CCNB1IP1,CCND1,CD74,CDC20,CDC42EP1,CDH10,CDH18,CDHR1,CDK5R2,CDKN1A,CDKN1B,CEP164,CFB,CHD1,CHD3,CHRDL1,CIT,CLDN5,CLEC3B,CLIP1,CLSTN1,COL2A1,COL4A4,C…	319
(b) Cerebellum DOWN-regualted genes - IPA
Category	Diseases or Functions Annotation	p-Value	Predicted Activation State	Activation z-score	Molecules	# Molecules
Cell Cycle	aneuploidy of splenocytes	3.27e-05			BUB1,CDC20,TP53	3
Cell Cycle	meiosis of oocytes	7.6e-05		0.6	BUB1,CDC20,HSF1,KIT,PPP1R2	5
Cell Cycle	meiosis of female germ cells	0.000466		0.6	BUB1,CDC20,HSF1,KIT,PPP1R2,REC8	6
Cellular Compromise	depletion of cells	0.000522		-0.192	Bbc3,IL15,KIT,NFATC2,P2RX7,ST14,TP53	7
Cell-To-Cell Signaling and Interaction	chemoattraction of T lymphocytes	0.000609			CCL21,IL15,IL16	3
Cancer	hyperplasia of retina	0.000609			CCND1,CDKN1B,TP53	3
Carbohydrate Metabolism	loss of proteoglycan	0.000609			COL2A1,P2RX7,TNC	3
Cell Cycle	meiosis I of oocytes	0.000609			BUB1,CDC20,HSF1	3
Cell Cycle	meiosis of germ cells	0.00069		0.6	BUB1,CDC20,HSF1,KIT,PPP1R2,REC8,SYCP1,TP53	8
Cell Morphology	shape change of connective tissue cells	0.000771		0.896	CDKN1B,ITGB1BP1,P2RX7,TGFB1I1,TP53,VASP	6
(c) Cerebellum UP-regulated genes - IPA
Category	Diseases or Functions Annotation	p-Value	Predicted Activation State	Activation z-score	Molecules	# Molecules
Endocrine System Development and Function	glucose tolerance	7.65e-05		-0.466	APOC1,ATF2,CARTPT,CDKN1A,DLK1,EIF2AK2,EPM2A,FOXA2,Gnas,HTR2C,KLF15,MED1,OGT,PAM,PDK4,TLR2	16
Digestive System Development and Function	morphology of liver	8.3e-05			ADA,BPNT1,CD1D,CDKN1A,DLK1,LHX2,LPL,MAN2A2,MED1,NCOA6,PPT1,RB1CC1,SOAT1,SPTBN1,TIMP3,TLR2,TRIM55	17
Cardiovascular Disease	thrombosis of renal glomerulus	9.13e-05			C2,CFB,TLR2	3
Cell Death and Survival	degeneration of hippocampal neurons	0.000121		-1.982	EPM2A,GRIA2,PARK2,PPT1	4
Reproductive System Development and Function	quantity of placental cells	0.000223			ATF2,IGF2,NCOA6	3
Digestive System Development and Function	abnormal morphology of liver	0.00037			ADA,BPNT1,CD1D,DLK1,LHX2,LPL,MAN2A2,NCOA6,PPT1,RB1CC1,SOAT1,SPTBN1,TRIM55	13
Nucleic Acid Metabolism	metabolism of purine base	0.000437			ADA,TPMT,XDH	3
Nutritional Disease	weight gain	0.000602			ADRB1,ARID5B,CARTPT,CDKN1A,EPM2A,Gnas,GRM5,HTR2C,LPL,PARK2,PER2,SMARCA2,TLR2,TRIM55,XDH	15
Embryonic Development	development of lens	0.000751			CDKN1A,FYCO1,IGF2,LHX2,MED1	5
Small Molecule Biochemistry	synthesis of neurotransmitter	0.000751			NR4A2,SLC5A7,SLC6A3,SYT1,TH	5
(d) Hippocampus Differentially expressed genes - IPA
Category	Diseases or Functions Annotation	p-Value	Predicted Activation State	Activation z-score	Molecules	# Molecules
Neurological Disease	seizures	3.19e-06	Increased	3.525	C1QA,C3,CACNB4,CIT,GABBR1,GDI1,GNAO1,GNG7,GRIN1,HCN1,KCNAB2,Kcnip2,KCNJ11,KCNK2,KIF5A,NCDN,NPY2R,PLCB1,PLCL1,PPP1R9A,PPP1R9B,PPP3CB,PTPRN,SCN1A,SCN1B,SH3GL2,SLC1A2,SLC37A4,SV2A,SYN1,SYN2,TGM2,USF2	33
Endocrine System Disorders	insulin resistance	1e-05		1.08	ADRA1B,AGT,AKT2,APOC1,BMP7,C3,CDKN1A,CDKN1B,CTHRC1,DLK1,EIF2AK2,EIF4EBP2,GCKR,Gnas,GSK3B,IGF1R,LPIN1,LPL,MAPK8,Mup1 (includes others),PPP3CB,PRLR,SERTAD2,SLC2A4,THRA	25
Endocrine System Development and Function	glucose tolerance	2.41e-05		1.175	ADRA1B,AKT2,APOC1,CBL,CDKN1A,CDKN1B,DLK1,EIF2AK2,EPM2A,GCKR,GNAO1,Gnas,GSK3A,GSK3B,KCNJ11,MED1,PAM,PDK4,PRKCD,PRLR,PTPRN,SAT1,SLC2A4,TCF7L2,TGM2,THRA,UNC13A,ZBTB20	28
Cell-To-Cell Signaling and Interaction	release of neurotransmitter	2.6e-05	Decreased	-2.017	ADRA1B,AGT,C3,CPLX2,DOC2B,GLUL,GRIN1,GRM2,LILRB3,PARK2,PPP3CB,PRKCB,SERPINE1,SNAP25,SYN1,SYN2,SYP,SYT1,UNC13A	19
Molecular Transport	transport of K+	5.94e-05			Ank2,AQP1,CDKN1B,KCNB1,KCNJ11,KCNK2,SLC1A2	7
Molecular Transport	transport of metal ion	6.01e-05		-1.387	AGT,Ank2,AQP1,ATP2B1,ATP2B2,CACNB4,CAMK2D,CDKN1B,GRIN1,KCNB1,KCNJ11,KCNK2,Mmgt2,PRKCB,SCN1A,SCN2A,SLC11A2,SLC1A2,SLC8A1,SLN,YWHAB	21
Molecular Transport	transport of inorganic cation	7.01e-05		-1.387	AGT,Ank2,AQP1,ATP2B1,ATP2B2,ATP6V1C2,CACNB4,CAMK2D,CDKN1B,GRIN1,KCNB1,KCNJ11,KCNK2,Mmgt2,PRKCB,SCN1A,SCN2A,SLC11A2,SLC1A2,SLC2A4,SLC8A1,SLN,YWHAB	23
Molecular Transport	transport of monovalent inorganic cation	7.21e-05			Ank2,AQP1,ATP6V1C2,CDKN1B,KCNB1,KCNJ11,KCNK2,SCN1A,SCN2A,SLC11A2,SLC1A2,SLC2A4,SLC8A1,YWHAB	14
Metabolic Disease	glucose metabolism disorder	9.61e-05		1.416	ACTA2,ADRA1B,AGT,AKT2,AMICA1,APOC1,BMP7,C3,CDKN1A,CDKN1B,CEBPA,CFB,CFH,CTHRC1,CX3CR1,DLK1,DMBX1,EIF2AK2,EIF4EBP2,EPM2A,GCKR,Gnas,GSK3B,HLA-B,HLA-DQA1,HLA-DQB1,IGF1R,KCNJ11,LEF1,LILRB3,LPIN1,LPL,MAPK8,Mup1 (includes others),NAIP,P2RY13,PPP3CB,PRKCD,PRLR,PTPRN,SERPINE1,SERTAD2,SLC2A4,SLC37A4,TCF7L2,TGM2,THRA,XAF1,ZBTB20	49
Cell-To-Cell Signaling and Interaction	neurotransmission	0.0001		-0.465	CACNB4,CACNG8,CPLX2,CRHBP,DLG4,EIF4EBP2,GABBR1,GABRA4,GRIN1,GRM2,HCN1,HLA-B,JPH4,KCNJ11,NLGN2,NPY2R,NRCAM,PARK2,PIP5K1C,PPP1R15A,PPP1R9A,PPP1R9B,PRKCB,PRKCG,RASD2,SCN1A,SCN1B,SH3GL2,SLC17A7,SNAP25,SV2A,SYN1,SYP,SYT1,UNC13A	35
(e) Hippocampus DOWN-regulated genes - IPA
Category	Diseases or Functions Annotation	p-Value	Predicted Activation State	Activation z-score	Molecules	# Molecules
Neurological Disease	seizures	6.3e-09	Increased	4.077	C1QA,CACNB4,GABBR1,GDI1,GNAO1,GNG7,GRIN1,HCN1,KCNAB2,Kcnip2,KCNJ11,KCNK2,KIF5A,NCDN,NPY2R,PLCB1,PPP1R9A,PPP1R9B,PPP3CB,PTPRN,SCN1A,SCN1B,SH3GL2,SLC1A2,SV2A,SYN1,SYN2,TGM2,USF2	29
Cell-To-Cell Signaling and Interaction	neurotransmission	1.4e-06		-0.751	CACNB4,CACNG8,CPLX2,CRHBP,DLG4,EIF4EBP2,GABBR1,GRIN1,HCN1,JPH4,KCNJ11,NLGN2,NPY2R,PIP5K1C,PPP1R15A,PPP1R9A,PPP1R9B,PRKCB,PRKCG,RASD2,SCN1A,SCN1B,SH3GL2,SLC17A7,SNAP25,SV2A,SYN1,SYP,SYT1	29
Molecular Transport	transport of metal ion	2.24e-06			Ank2,AQP1,ATP2B1,ATP2B2,CACNB4,CDKN1B,GRIN1,KCNB1,KCNJ11,KCNK2,Mmgt2,PRKCB,SCN1A,SCN2A,SLC11A2,SLC1A2,SLC8A1,YWHAB	18
Molecular Transport	transport of K+	2.28e-06			Ank2,AQP1,CDKN1B,KCNB1,KCNJ11,KCNK2,SLC1A2	7
Molecular Transport	transport of metal	2.96e-06	Decreased	-2.213	ABCB10,Ank2,AQP1,ATP2B1,ATP2B2,CACNB4,CDKN1B,GRIN1,KCNB1,KCNJ11,KCNK2,Mmgt2,PRKCB,SCN1A,SCN2A,SLC11A2,SLC1A2,SLC8A1,YWHAB	19
Behavior	behavior	3.63e-06	Decreased	-2.692	ATP2B2,CACNB4,CCND1,CEBPA,CPLX2,CRHBP,CX3CR1,DLG4,EFNA3,EIF4EBP2,FXR2,GABBR1,GIT1,GNAO1,Gnas,GNB1,GNG7,GRIN1,GSK3B,HCN1,IGF1R,JPH4,KCNAB2,KCNJ11,MAP1B,Map2,MAP6,MUT,NCDN,NDRG4,NEURL,NEUROD2,NFATC2,NLGN2,NPY2R,NTRK3,PEG3,PLCB1,PPME1,PPP1R9A,PPP1R9B,PRKCE,PRKCG,PRLR,PTPRN,RAPGEF3,RIN1,SCN1A,SCN8A,SEPT5,SLC11A2,SLC17A7,SLC1A2,SRPK2,SYNE1,SYT1,THRA,TTR	58
Cell-To-Cell Signaling and Interaction	miniature excitatory postsynaptic currents	6e-06			C1QA,CPLX2,DOC2B,MADD,PIP5K1C,PPP1R9A,SH3GL2,SLC17A7,SNAP25,SYT1	10
Molecular Transport	transport of monovalent inorganic cation	9.26e-06			Ank2,AQP1,CDKN1B,KCNB1,KCNJ11,KCNK2,SCN1A,SCN2A,SLC11A2,SLC1A2,SLC8A1,YWHAB	12
Cell-To-Cell Signaling and Interaction	synaptic transmission	2.91e-05		-0.728	CACNB4,CACNG8,CRHBP,DLG4,EIF4EBP2,GABBR1,GRIN1,NLGN2,NPY2R,PIP5K1C,PPP1R15A,PPP1R9A,PPP1R9B,PRKCB,PRKCG,RASD2,SH3GL2,SLC17A7,SNAP25,SV2A,SYP,SYT1	22
Behavior	emotional behavior	3.23e-05		-1.45	CPLX2,DLG4,FXR2,GABBR1,GIT1,GNAO1,GNG7,GRIN1,GSK3B,IGF1R,KCNJ11,Map2,NEUROD2,NPY2R,PPP1R9B,PRLR,PTPRN,RIN1,SLC17A7,SYNE1	20
(f) Hippocampus UP-regulated genes - IPA
Category	Diseases or Functions Annotation	p-Value	Predicted Activation State	Activation z-score	Molecules	# Molecules
Metabolic Disease	glucose metabolism disorder	4.54e-05		-1.246	ADRA1B,AGT,AMICA1,APOC1,BMP7,C3,CDKN1A,CFB,DLK1,DMBX1,EIF2AK2,EPM2A,GCKR,HLA-B,HLA-DQA1,HLA-DQB1,LEF1,LILRB3,LPL,Mup1 (includes others),PRKCD,SERPINE1,SERTAD2,SLC2A4,SLC37A4,TCF7L2	26
Endocrine System Development and Function	glucose tolerance	8.09e-05	Increased	2.043	ADRA1B,APOC1,CDKN1A,DLK1,EIF2AK2,EPM2A,GCKR,MED1,PAM,PDK4,PRKCD,SAT1,SLC2A4,TCF7L2,UNC13A	15
Metabolic Disease	insulin resistance	0.000111		-0.793	ADRA1B,AGT,APOC1,BMP7,C3,CDKN1A,DLK1,EIF2AK2,GCKR,LPL,Mup1 (includes others),SERTAD2,SLC2A4	13
Hematological Disease	cerebral malaria	0.000169			C3,CFB,LTA	3
Connective Tissue Development and Function	mass of adipose tissue	0.000269		-0.712	AGT,APOC1,ATXN2,C3,CDKN1A,DLK1,LPL,PLVAP,SAT1,SERPINE1,SLC2A4	11
Infectious Disease	Parasitic Infection	0.000298		-0.537	C3,CFB,EIF2AK2,HLA-DQB1,LTA,NFATC2IP,PRKCD,RGS16	8
Carbohydrate Metabolism	synthesis of D-glucose	0.0003		0.2	ADRA1B,LPL,Mup1 (includes others),SLC2A4,SLC37A4,TCF7L2	6
Embryonic Development	development of choroid	0.000331			MED1,MITF,SERPINE1	3
Tissue Morphology	quantity of podocytes	0.000331			ACTN4,BMP7,CDKN1A	3
Carbohydrate Metabolism	quantity of glycogen	0.000367		-1	ADRA1B,ATXN2,CXADR,EPM2A,GCKR,PDK4,SLC2A4,SLC37A4	8
(g) Cerebellum Differentially expressed genes - Gene Ontology
Category	Term	Count	Benjamini
PANTHER_MF_ALL	MF00175:Major histocompatibility complex antigen	12	9.23729e-06
INTERPRO	IPR011161:MHC class I-like antigen recognition	11	1.07721e-05
GOTERM_CC_FAT	GO:0042611~MHC protein complex	11	2.82191e-05
PANTHER_FAMILY	PTHR16675~MHC CLASS I-RELATED	10	5.16951e-05
INTERPRO	IPR001039:MHC class I, alpha chain, alpha1 and alpha2	10	5.43361e-05
PANTHER_BP_ALL	BP00150:MHCI-mediated immunity	9	0.000672716
GOTERM_CC_FAT	GO:0044459~plasma membrane part	92	0.000918677
GOTERM_BP_FAT	GO:0019882~antigen processing and presentation	14	0.00124831
GOTERM_CC_FAT	GO:0009986~cell surface	24	0.00467694
GOTERM_CC_FAT	GO:0009897~external side of plasma membrane	18	0.00569232
SMART	SM00407:IGc1	9	0.0218059
INTERPRO	IPR003597:Immunoglobulin C1-set	9	0.0260073
KEGG_PATHWAY	mmu05332:Graft-versus-host disease	6	0.0357156
KEGG_PATHWAY	mmu05330:Allograft rejection	6	0.0357156
SP_PIR_KEYWORDS	immune response	17	0.0464582
(h) Cerebellum UP-regualted genes - Gene Ontology
Category	Term	Count	Benjamini
GOTERM_CC_FAT	GO:0042611~MHC protein complex	9	7.54201e-06
GOTERM_CC_FAT	GO:0042612~MHC class I protein complex	8	2.62391e-05
INTERPRO	IPR011161:MHC class I-like antigen recognition	8	6.57951e-05
INTERPRO	IPR001039:MHC class I, alpha chain, alpha1 and alpha2	8	8.49004e-05
INTERPRO	IPR001909:Krueppel-associated box	20	0.000104157
SMART	SM00349:KRAB	20	0.000412741
INTERPRO	IPR013087:Zinc finger, C2H2-type/integrase, DNA-binding	26	0.00105143
INTERPRO	IPR007087:Zinc finger, C2H2-type	31	0.00164487
GOTERM_BP_FAT	GO:0019882~antigen processing and presentation	10	0.00292226
INTERPRO	IPR015880:Zinc finger, C2H2-like	30	0.003361
INTERPRO	IPR003597:Immunoglobulin C1-set	7	0.00470915
SMART	SM00407:Imunoglobulin c1	7	0.00764705
KEGG_PATHWAY	mmu05330:Allograft rejection	5	0.00993084
KEGG_PATHWAY	mmu05332:Graft-versus-host disease	5	0.00993084
KEGG_PATHWAY	mmu05320:Autoimmune thyroid disease	5	0.0103458
KEGG_PATHWAY	mmu04612:Antigen processing and presentation	7	0.0114581
SMART	SM00355:ZnF_C2H2	30	0.0116131
KEGG_PATHWAY	mmu04940:Type I diabetes mellitus	5	0.0150355
PIR_SUPERFAMILY	PIRSF001990:class I histocompatibility antigen	5	0.0210775
(i) Hippocampus Differentially expressed genes - Gene Ontology
Category	Term	Count	Benjamini
GOTERM_CC_ALL	GO:0045202~synapse	36	0.000757867
GOTERM_CC_ALL	GO:0005886~plasma membrane	135	0.00374367
GOTERM_CC_ALL	GO:0044459~plasma membrane part	89	0.00385503
GOTERM_CC_ALL	GO:0030136~clathrin-coated vesicle	17	0.00440353
GOTERM_CC_ALL	GO:0030054~cell junction	38	0.00504306
GOTERM_CC_ALL	GO:0042995~cell projection	48	0.00513038
GOTERM_CC_ALL	GO:0008021~synaptic vesicle	14	0.00513191
GOTERM_CC_ALL	GO:0043005~neuron projection	27	0.0078653
GOTERM_CC_ALL	GO:0030863~cortical cytoskeleton	9	0.0209161
GOTERM_CC_ALL	GO:0030135~coated vesicle	17	0.0268522
GOTERM_CC_ALL	GO:0019898~extrinsic to membrane	38	0.0277141
GOTERM_CC_ALL	GO:0030425~dendrite	15	0.028565
GOTERM_CC_ALL	GO:0005856~cytoskeleton	69	0.0376124
GOTERM_CC_ALL	GO:0044448~cell cortex part	11	0.0394416
KEGG_PATHWAY	mmu04270:Vascular smooth muscle contraction	15	0.0303868
KEGG_PATHWAY	mmu04916:Melanogenesis	13	0.0325718
KEGG_PATHWAY	mmu04530:Tight junction	16	0.0334448
PANTHER_BP_ALL	BP00166:Neuronal activities	45	0.01104
PANTHER_BP_ALL	BP00112:Calcium mediated signaling	15	0.0423218
PANTHER_MF_ALL	MF00091:Cytoskeletal protein	51	0.00608181
PANTHER_MF_ALL	MF00031:Voltage-gated ion channel	17	0.00814232
PANTHER_MF_ALL	MF00032:Voltage-gated sodium channel	6	0.0153032
SP_PIR_KEYWORDS	voltage-gated channel	19	0.00122375
SP_PIR_KEYWORDS	actin-binding	25	0.00735252
SP_PIR_KEYWORDS	potassium channel	11	0.0224854
SP_PIR_KEYWORDS	potassium transport	14	0.0232045
SP_PIR_KEYWORDS	phosphoprotein	343	0.0332512
SP_PIR_KEYWORDS	alternative splicing	237	0.0364741
SP_PIR_KEYWORDS	calmodulin-binding	14	0.0396291
(j) Hippocampus DOWN-regulated genes - Gene Ontology
Category	Term	Count	Benjamini
SP_PIR_KEYWORDS	voltage-gated channel	18	5.26e-06
SP_PIR_KEYWORDS	phosphoprotein	237	8.45e-05
GOTERM_CC_FAT	GO:0044459~plasma membrane part	68	0.000147
GOTERM_CC_FAT	GO:0008021~synaptic vesicle	13	0.000158
GOTERM_CC_FAT	GO:0005886~plasma membrane	100	0.000167
GOTERM_CC_FAT	GO:0042995~cell projection	38	0.000188
GOTERM_CC_FAT	GO:0045202~synapse	27	0.00019
SP_PIR_KEYWORDS	potassium transport	14	0.000217
GOTERM_CC_FAT	GO:0044456~synapse part	21	0.000218
GOTERM_CC_FAT	GO:0030425~dendrite	15	0.000332
GOTERM_CC_FAT	GO:0043005~neuron projection	23	0.00036
SP_PIR_KEYWORDS	potassium	14	0.000473
SP_PIR_KEYWORDS	potassium channel	11	0.000584
SP_PIR_KEYWORDS	cell junction	26	0.00116203
SP_PIR_KEYWORDS	synapse	19	0.00119577
SP_PIR_KEYWORDS	ionic channel	20	0.00131384
GOTERM_CC_FAT	GO:0030054~cell junction	29	0.00147145
GOTERM_MF_FAT	GO:0030955~potassium ion binding	14	0.00229543
GOTERM_MF_FAT	GO:0031420~alkali metal ion binding	18	0.00233047
GOTERM_MF_FAT	GO:0008092~cytoskeletal protein binding	31	0.00274489
GOTERM_MF_FAT	GO:0005516~calmodulin binding	15	0.003317
GOTERM_MF_FAT	GO:0046873~metal ion transmembrane transporter activity	23	0.00334193
GOTERM_CC_FAT	GO:0019898~extrinsic to membrane	30	0.00384675
GOTERM_CC_FAT	GO:0031226~intrinsic to plasma membrane	24	0.00429994
GOTERM_CC_FAT	GO:0030136~clathrin-coated vesicle	13	0.00440609
GOTERM_CC_FAT	GO:0043025~cell soma	13	0.00447322
GOTERM_MF_FAT	GO:0005261~cation channel activity	19	0.00478163
GOTERM_CC_FAT	GO:0005856~cytoskeleton	51	0.00546322
GOTERM_MF_FAT	GO:0022832~voltage-gated channel activity	18	0.00566112
GOTERM_MF_FAT	GO:0005244~voltage-gated ion channel activity	18	0.00566112
GOTERM_MF_FAT	GO:0003779~actin binding	23	0.00629419
SP_PIR_KEYWORDS	sodium channel	6	0.00650223
GOTERM_BP_FAT	GO:0030001~metal ion transport	29	0.00687358
SP_PIR_KEYWORDS	actin-binding	18	0.00689976
SP_PIR_KEYWORDS	calmodulin-binding	12	0.00694396
SP_PIR_KEYWORDS	cytoskeleton	33	0.00877303
GOTERM_MF_FAT	GO:0022836~gated channel activity	20	0.0105179
SP_PIR_KEYWORDS	alternative splicing	156	0.0106265
SP_PIR_KEYWORDS	calcium	32	0.011197
GOTERM_CC_FAT	GO:0005887~integral to plasma membrane	22	0.0118526
GOTERM_MF_FAT	GO:0022843~voltage-gated cation channel activity	13	0.0120883
GOTERM_MF_FAT	GO:0005267~potassium channel activity	13	0.0120883
GOTERM_CC_FAT	GO:0034703~cation channel complex	10	0.0136361
SP_PIR_KEYWORDS	ion transport	26	0.0148519
GOTERM_CC_FAT	GO:0030135~coated vesicle	13	0.0160658
GOTERM_CC_FAT	GO:0001518~voltage-gated sodium channel complex	4	0.0160915
GOTERM_CC_FAT	GO:0044463~cell projection part	14	0.0164928
GOTERM_CC_FAT	GO:0044448~cell cortex part	9	0.0179178
GOTERM_MF_FAT	GO:0005272~sodium channel activity	6	0.018833
GOTERM_CC_FAT	GO:0030863~cortical cytoskeleton	7	0.019136
GOTERM_MF_FAT	GO:0005249~voltage-gated potassium channel activity	11	0.0194279
GOTERM_MF_FAT	GO:0022838~substrate specific channel activity	21	0.0209209
GOTERM_CC_FAT	GO:0034706~sodium channel complex	4	0.0211199
GOTERM_CC_FAT	GO:0034702~ion channel complex	12	0.0227313
GOTERM_MF_FAT	GO:0022803~passive transmembrane transporter activity	21	0.0230417
GOTERM_MF_FAT	GO:0015267~channel activity	21	0.0230417
GOTERM_CC_FAT	GO:0034705~potassium channel complex	8	0.0274403
GOTERM_CC_FAT	GO:0008076~voltage-gated potassium channel complex	8	0.0274403
GOTERM_MF_FAT	GO:0005216~ion channel activity	20	0.0369369
GOTERM_BP_FAT	GO:0015672~monovalent inorganic cation transport	20	0.0407543
GOTERM_BP_FAT	GO:0006813~potassium ion transport	15	0.0450905
GOTERM_BP_FAT	GO:0006812~cation transport	29	0.0457581
